# Supplementary material
Source: publisher figshare collection journal article supplement (https://acs.figshare.com/ndownloader/files/4447375)

### Supporting Information

Table S1: Protein and metal concentrations in isolated mitochondria. Mitochondria isolated from cells grown on glycerol, galactose, and glucose are designated R# (respiring), RF# (respirofermenting) and F# (fermenting), respectively. Batches F1 – F4 were from cells grown on YPD media while F5 – F16 were from cells grown on minimal media. Sample characterizations are denoted (MB) Mössbauer, (U) UV-vis Spectroscopy, (E) EPR, (P) protein analysis and (M) metal analysis.

| Batch | Protein (mg/mL) | Fe ( $\mu$ M) | Mn ( $\mu$ M) | Cu ( $\mu$ M) | Zn ( $\mu$ M) | Characterization |
|-------|-----------------|---------------|---------------|---------------|---------------|------------------|
| R1    | 200             | 750           | 23            | 360           | 420           | MB, U, E, P, M   |
| R2    | 180             | 600           | 46            | 63            | 320           | MB, U, E P, M    |
| R3    | 110             | 600           | 30            | 59            | 180           | U, P, M          |
| R4    | 120             | 670           | 42            | 110           | 82            | U, P, M          |
| R5    | 80              | 320           | 6.1           | 270           | 200           | E, P, M          |
| RF1   | 200             | 770           | 13            | 80            | 270           | MB, E, P, M      |
| RF2   | 120             | 690           | 8             | 170           | 100           | U, E, P, M       |
| F1    | 74              | 640           | 30            | 36            | 540           | U, P, M          |
| F2    | 64              | 520           | 12            | 95            | 580           | U, P, M          |
| F3    | 86              | 650           | 11            | 92            | 220           | U, P, M          |
| F4    | 80              | 530           | 27            | 58            | 190           | U, P, M          |
| F5    | 120             | 850           | 7.2           | 46            | 180           | MB, P, M         |
| F6    | 96              | 280           | 2.5           | 14            | 75            | MB, P, M         |

|     |     |      |     |     |     |          |
|-----|-----|------|-----|-----|-----|----------|
| F7  | 74  | 620  | 6.3 | 28  | 220 | MB, P, M |
| F8  | 120 | 500  | 4.8 | 25  | 140 | MB, P, M |
| F9  | 99  | 560  | 3.9 | 22  | 140 | MB, P, M |
| F10 | 120 | 1300 | 1.6 | 41  | 280 | E, P, M  |
| F11 | 89  | 470  | 22  | 4.5 | 89  | E, P, M  |
| F12 | N/A | N/A  | N/A | N/A | N/A | MB       |
| F13 | N/A | N/A  | N/A | N/A | N/A | MB       |
| F14 | N/A | N/A  | N/A | N/A | N/A | MB       |
| F15 | N/A | N/A  | N/A | N/A | N/A | MB       |
| F16 | N/A | N/A  | N/A | N/A | N/A | MB       |

Figure S1. Electronic absorption spectra of heme-containing proteins. A, cytochrome *c* oxidase; B, cytochrome *b*<sub>5</sub>; C, cytochrome *c*. Data were treated as described in *Experimental Procedures*. The heme *b* in cytochrome *b*<sub>5</sub> is LS, whereas the heme *b* groups in mitochondria are both LS and HS. The spectrum of HS heme *b* differs, but the extinction coefficients in the region used in fitting (~ 560 nm) was insignificantly different. Thus, our estimate of the heme *b* concentration in mitochondria will not be affected by calibrating with a LS center.

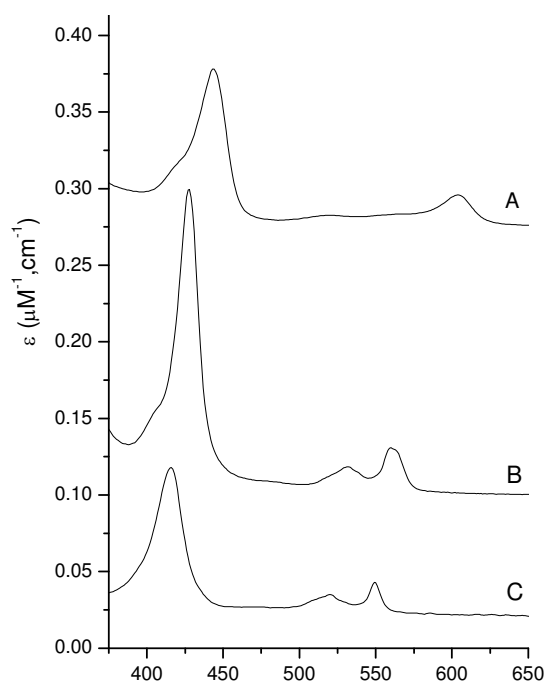

Figure S2. Protection of cytochrome c from protease degradation in isolated mitochondria. A sample of isolated mitochondria (50  $\mu\text{g}$  of protein) was subjected to SDS-PAGE using a 12% polyacrylamide gel. Lane 1, control with no proteinase K (Fisher Scientific) added. Lanes 2 and 3, samples treated with 100  $\mu\text{g}/\text{mL}$  and 500  $\mu\text{g}/\text{mL}$  of proteinase K, respectively for 30 min. Samples were treated with PMSF (1 mM final concentration) for 30 min to inhibit protease activity and then with 0.5% deoxycholate prior to SDS-PAGE. Lanes 4 and 5, samples treated with 100  $\mu\text{g}/\text{mL}$  and 500  $\mu\text{g}/\text{mL}$  of proteinase K, respectively, in the presence of 0.5% deoxycholate.

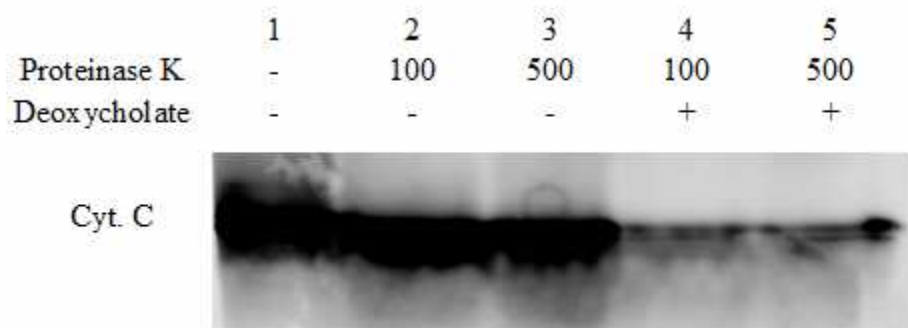

Figure S3. Mössbauer spectra of a respiring mitochondrial batch (Batch R2) not shown in Figure 1 but used in constructing Table 1. A, 4.5 K, 0.04 T parallel field; B, 100 K 0.04 T parallel field; and C, 4.2 K, 8 T applied field.

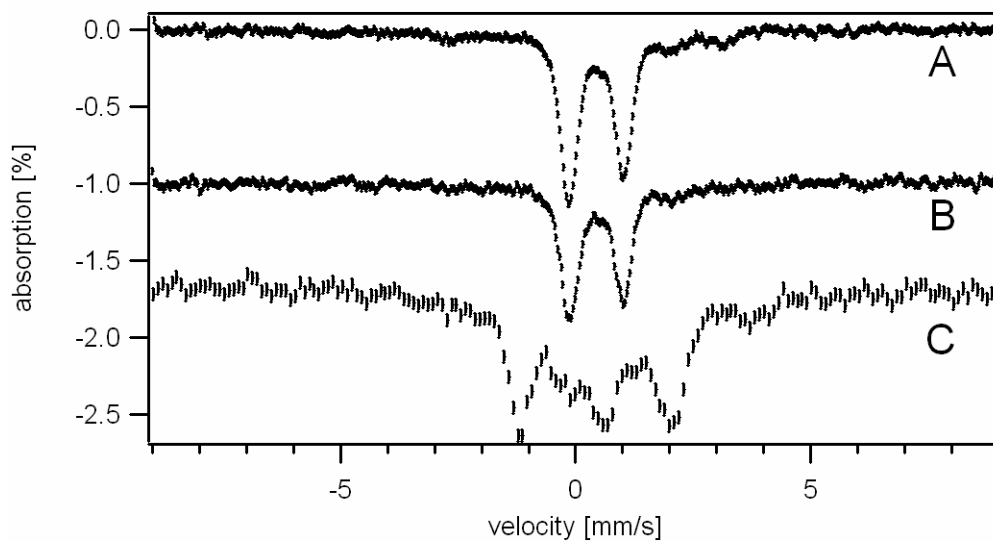

Figure S4. Electronic absorption spectra of respiring mitochondria suspensions. A, Batch R3 (protein concentration, 45 mg/mL); B, Batch R4 (44 mg/mL); and C, Batch R2 (74 mg/mL). Dotted lines are composite spectra using the [Heme *a*], [Heme *b*], and [Heme *c*] concentrations given in Table S2.

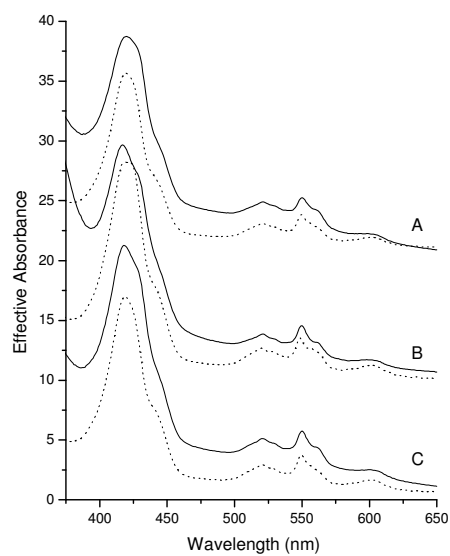

Table S2. Concentrations of each heme component determined for individual mitochondrial samples (in  $\mu\text{M}$ ). Values indicated are for neat mitochondria. Estimated uncertainties are  $\pm 20\%$  for each entry.

| Batch | [Heme <i>a</i> ] | [Heme <i>b</i> ] | [Heme <i>c</i> ] |
|-------|------------------|------------------|------------------|
| R1    | 45               | 43               | 110              |
| R2    | 55               | 44               | 130              |
| R3    | 60               | 60               | 130              |
| R4    | 44               | 44               | 120              |
| F1    | 15               | 30               | 85               |
| F2    | 15               | 33               | 85               |
| F3    | 13               | 22               | 61               |
| F4    | 12               | 23               | 61               |

Figure S5. 10 K EPR spectra of mitochondria batches not shown in Figure 4 but used in the construction of Table 1. Spectra A, B, C and D are from Batches R5, R1, RF2 and F11, respectively. Spectra A, B and D were collected at 0.05 mW microwave power while spectrum C was collected at 0.2 mW. Microwave frequency, 9.468; modulation amplitude, 10 for A, C, D and 5 for B. Spectra A and C were multiplied by 1.5 while D was multiplied by 15.

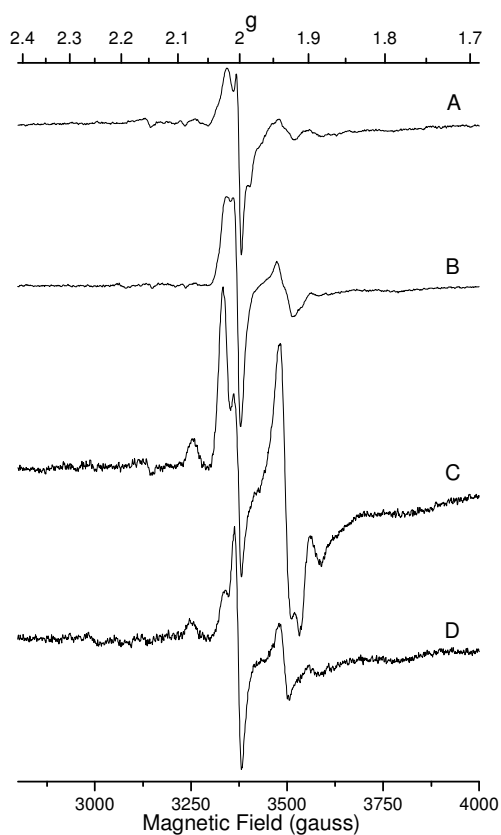



Figure S6. UV-Vis spectra of different batches of fermenting mitochondria. A, Batch F4 (33 mg/mL); B, Batch F1 (30 mg/mL) and C, Batch F2 (27 mg/mL). Dotted lines are composite spectra using the concentrations given in Table S2.

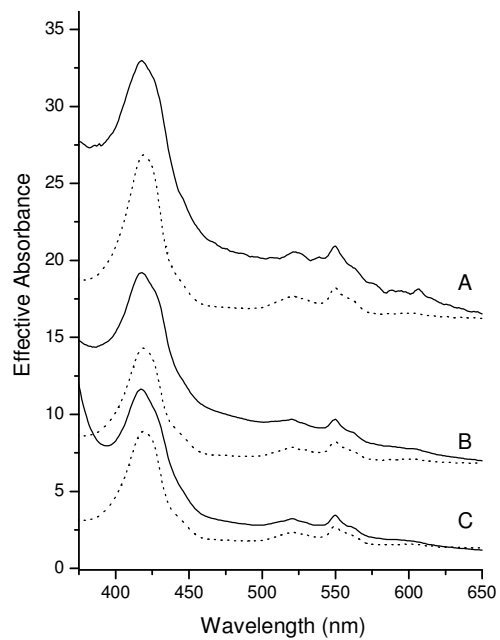

Supplement: Supplementary file 1 [file 4447375]
